# Supplementary material
Source: bioRxiv or medRxiv preprint supplement (https://www.biorxiv.org/highwire/filestream/25686/field_highwire_adjunct_files/19/077701-9.pdf)
Supplement: Supplementary file [file 077701-9.pdf]

## Sustaining Proliferative Signaling

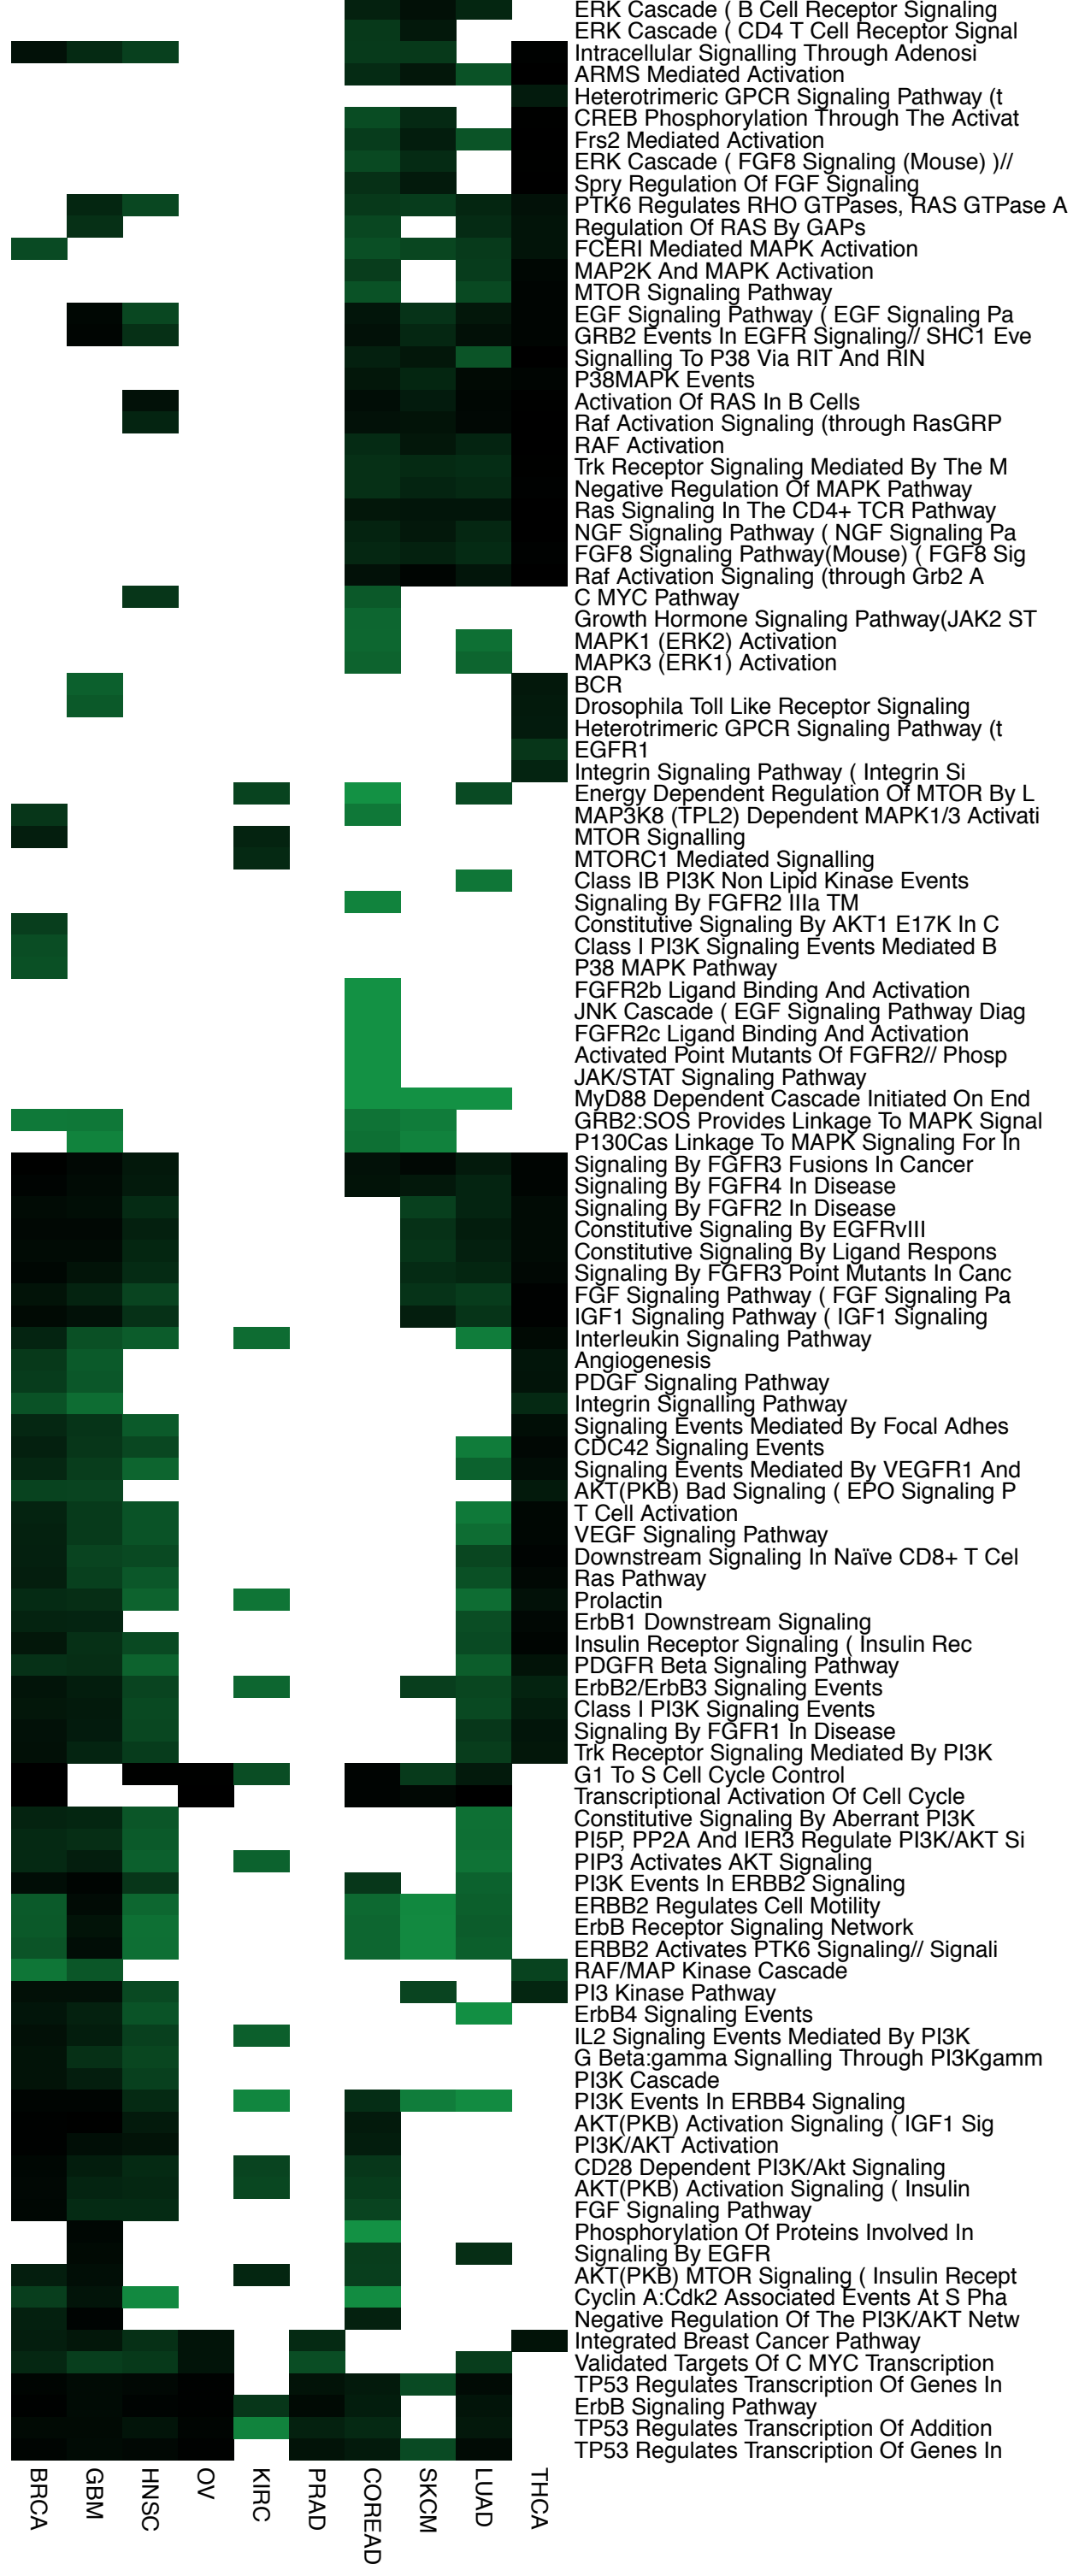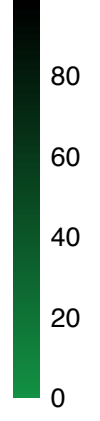

## Evading Growth Suppressors

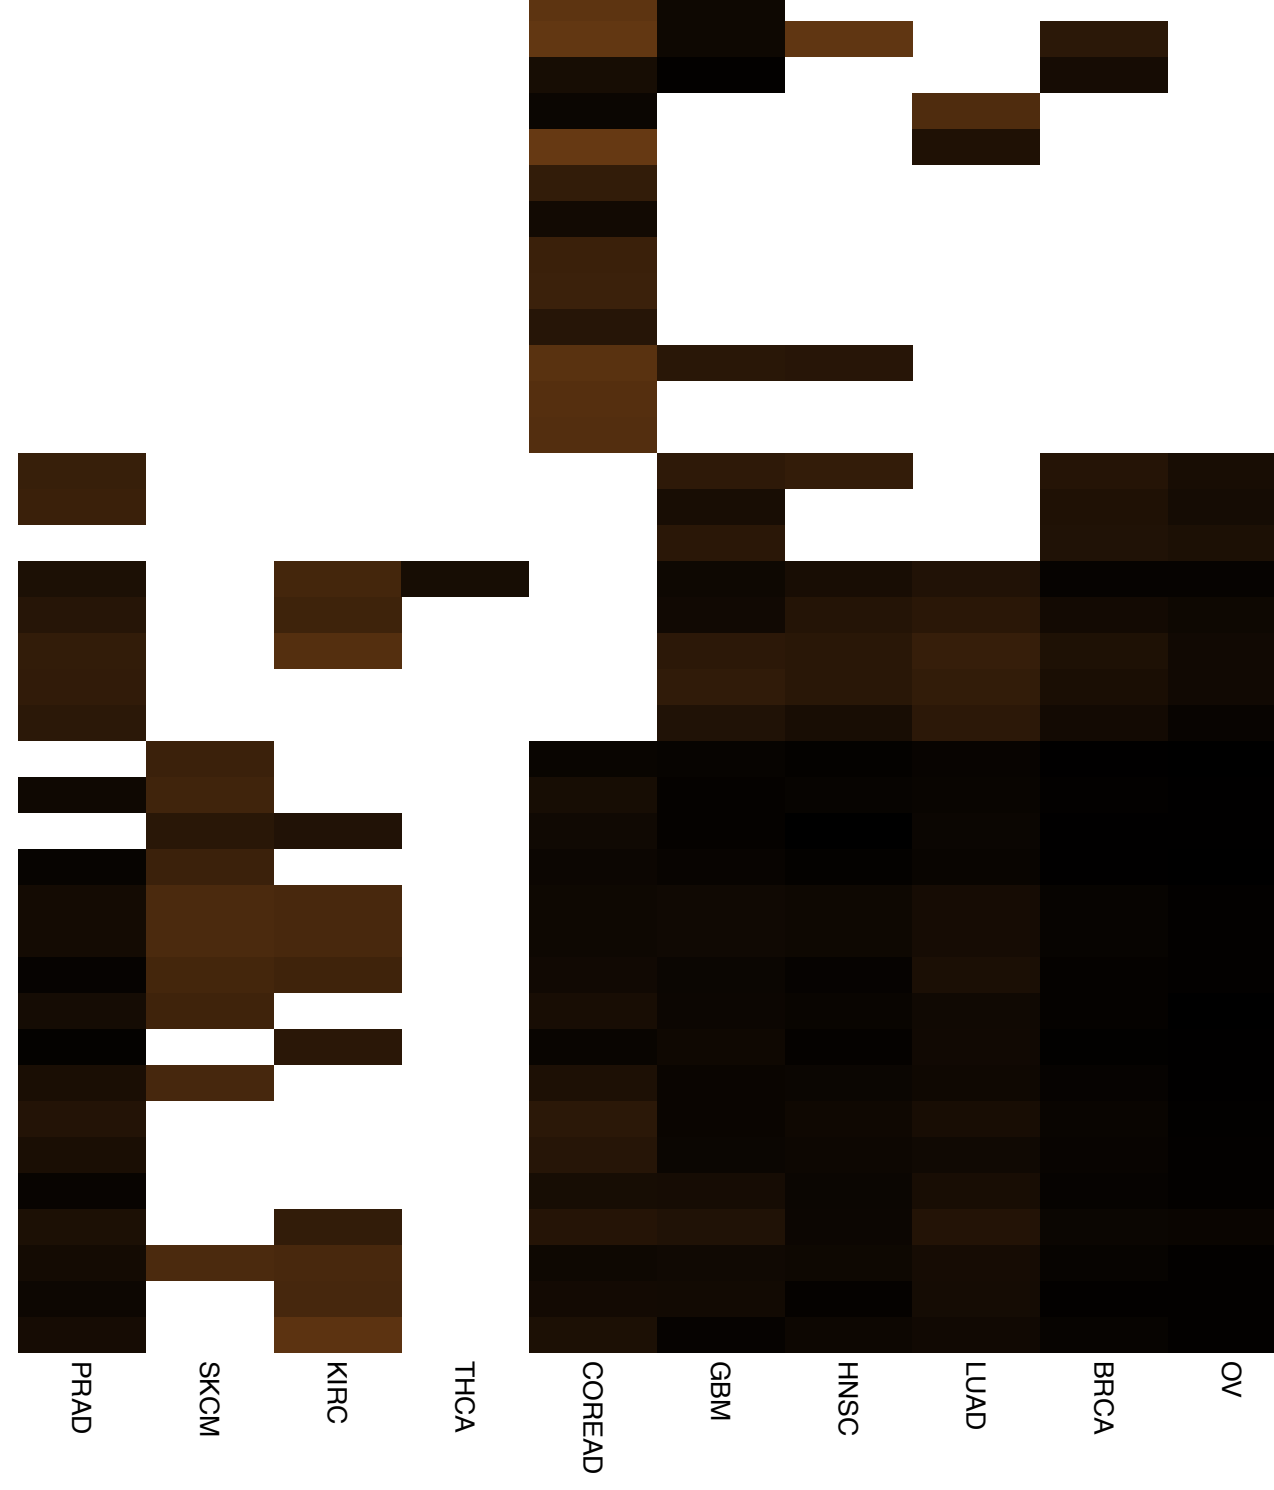

- Cyclin E Associated Events During G1/S T
- Inhibition Of Replication Initiation Of
- Cyclin A:Cdk2 Associated Events At S Pha
- Negative Regulation Of The PI3K/AKT Netw
- APC Truncation Mutants Have Impaired AXI
- Tetrachlorodibenzodioxin Inhibits The Re
- Negative Regulation Of (transcription By
- Gene Expression Of Smad6/7 By R Smad:sma
- SMAD2/SMAD3:SMAD4 Heterotrimer Regulates
- Downregulation Of SMAD2/3:SMAD4 Transcri
- TGF Beta Receptor Signaling Activates SM
- Cyclin D Associated Events In G1
- P53 Dependent G1 DNA Damage Response
- TGF Beta Receptor Signaling In EMT (epit
- AUF1 (hnRNP D0) Binds And Destabilizes M
- Direct P53 Effectors
- TGF Beta Receptor
- P53 Pathway Feedback Loops 2
- TP53 Regulates Metabolic Genes
- G2/M DNA Damage Checkpoint// Processing
- Regulation Of TP53 Activity Through Phos
- TP53 Regulates Transcription Of DNA Repa
- TP53 Network
- TP53 Regulates Transcription Of Death Re
- Senescence And Autophagy In Cancer
- P53 Pathway Feedback Loops 1
- TP53 Regulates Transcription Of Genes In
- TP53 Regulates Transcription Of Genes In
- TP53 Regulates Transcription Of Caspase
- TP53 Regulates Transcription Of Several
- Stabilization Of P53
- Regulation Of TP53 Activity Through Asso
- Regulation Of TP53 Activity Through Acet
- P53 Pathway By Glucose Deprivation
- Regulation Of TP53 Activity Through Meth
- Regulation Of TP53 Degradation
- TP53 Regulates Transcription Of Genes In
- P53 Pathway
- TP53 Regulates Transcription Of Addition

## Inducing Angiogenesis

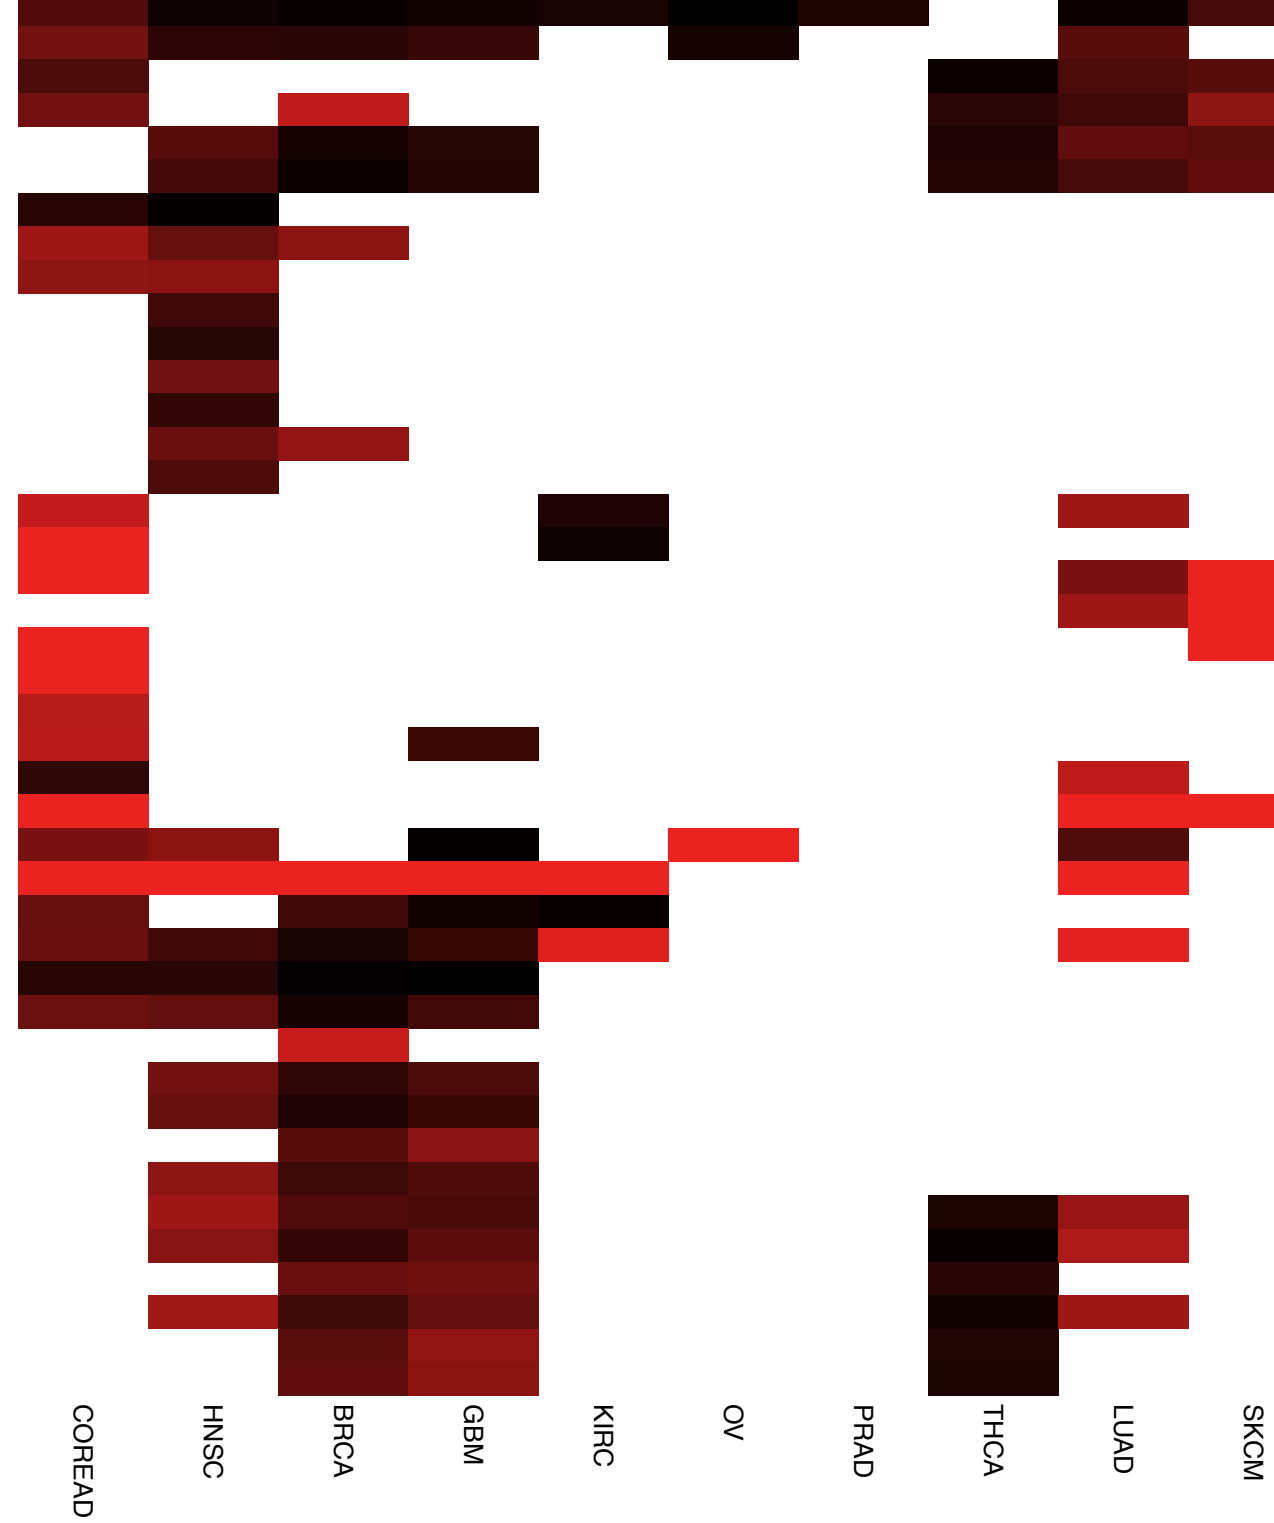

- Hypoxic And Oxygen Homeostasis Regulatio
- Pre NOTCH Transcription And Translation
- PDGF Signaling Pathway ( PDGF Signaling
- VEGFR2 Mediated Cell Proliferation
- PDGF Signaling Pathway (Mammal) ( PDGF S
- Tie2 Signaling
- Loss Of Function Of FBXW7 In Cancer And
- NOTCH1 Intracellular Domain Regulates Tr
- Regulation Of Gene Expression By Hypoxia
- Constitutive Signaling By NOTCH1 HD Doma
- Constitutive Signaling By NOTCH1 T(7;9)(
- Activated NOTCH1 Transmits Signal To The
- Pre NOTCH Processing In The Endoplasmic
- Constitutive Signaling By NOTCH1 HD+PEST
- Pre NOTCH Processing In Golgi
- HIF 2 Alpha Transcription Factor Network
- Oxygen Dependent Proline Hydroxylation O
- Neurophilin Interactions With VEGF And V
- VEGF And VEGFR Signaling Network// VEGF
- [CGB Protein Results In Increased Activi
- JNK Cascade ( EGF Signaling Pathway Diag
- VEGFR2 Mediated Vascular Permeability
- PDGF Pathway
- Canonical Wnt Signaling Pathway
- PDGF Receptor Signaling Network
- PTK6 Promotes HIF1A Stabilization
- Signaling By PDGF
- Hypoxia Response Via HIF Activation
- PDGFR Alpha Signaling Pathway
- AKT(PKB) Activation Signaling ( IGF1 Sig
- VEGFR3 Signaling In Lymphatic Endotheliu
- Wnt Signaling Pathway
- Angiopietin Receptor Tie2 Mediated Sign
- VEGFR1 Specific Signals
- Integrins In Angiogenesis
- VEGFA VEGFR2 Pathway
- PDGFR Beta Signaling Pathway
- VEGF Signaling Pathway
- AKT(PKB) Bad Signaling ( EPO Signaling P
- Signaling Events Mediated By VEGFR1 And
- Angiogenesis
- PDGF Signaling Pathway
